# Supplementary material
Source: HighWire-hosted journal article supplement (http://ajnr-stage2.highwire.org/highwire/filestream/102870/field_highwire_adjunct_files/0/0055.pdf)
Supplement: 0055.pdf [file 0055.pdf]

**Supplemental Table 1 – Demographics and imaging characteristics of CAA patients according to cognition**

|                                               | <b>Cognitively<br/>Normal (n=23)</b> | <b>MCI<br/>(n=10)</b> | <b>Dementia<br/>(n=25)</b> | <b>p-value</b>                                                                                                    |
|-----------------------------------------------|--------------------------------------|-----------------------|----------------------------|-------------------------------------------------------------------------------------------------------------------|
| <b>Mean age (years<br/>± std)</b>             | 67.17 (±10.65)                       | 70.8<br>(±8.82)       | 75.88<br>(±7.49)           | <b>F(2) = 5.537; p-<br/>value = 0.006</b><br>[TukeyHSD:<br>Dementia vs<br>Cognitively Normal:<br>p-value = 0.004] |
| <b>Male(%)</b>                                | 15 (65%)                             | 4 (40%)               | 10 (40%)                   | X(2) = 3.53; p-value<br>= 0.1711                                                                                  |
| <b>Hypertension<br/>(%)</b>                   | 18 (78%)                             | 8 (80%)               | 19 (76%)                   | Fisher's exact test;<br>p-value = 1                                                                               |
| <b>Dyslipidemia (%)</b>                       | 16 (70%)                             | 5 (50%)               | 13 (52%)                   | Fisher's exact test;<br>p-value = 0.4141                                                                          |
| <b>Diabetes (%)</b>                           | 8 (35%)                              | 1 (10%)               | 4 (16%)                    | Fisher's exact test;<br>p-value = 0.2162                                                                          |
| <b>Lobar<br/>hemorrhage</b>                   | 17 (74%)                             | 7 (70%)               | 18 (72%)                   | Fisher's exact test;<br>p-value = 1                                                                               |
| <b>Cortical<br/>superficial<br/>siderosis</b> | 11 (48%)                             | 7 (70%)               | 20 (80%)                   | Fisher's exact test;<br>p-value = 0.063                                                                           |
| <b>Lobar<br/>Microbleeds</b>                  |                                      |                       |                            |                                                                                                                   |
| <b>0</b>                                      | 4 (17.4%)                            | 1 (10%)               | 0 (0%)                     | Fisher's exact test;<br>p-value = 0.1563                                                                          |
| <b>1-5</b>                                    | 11 (47.8%)                           | 5 (50%)               | 10 (40%)                   |                                                                                                                   |
| <b>&gt;5</b>                                  | 8 (34.8%)                            | 4 (40%)               | 15 (60%)                   |                                                                                                                   |

Supplemental Table 1 – Summarized demographic information for 58 cerebral amyloid angiopathy (CAA) patients. Mean age is represented with standard deviation and male as number and percentage. Cognition as evaluated by a senior neurologist was divided into normal, mild cognitive impairment (MCI) and dementia and frequencies are shown as number and percentage.

**Supplemental Table 2 – Intra-class correlation coefficients**

| <b>Neuroimaging Feature</b> | <b>ICC</b> | <b>95% CI</b> |
|-----------------------------|------------|---------------|
| <b>AC</b>                   | 0.57       | [0.33; 0.74]  |
| <b>OF</b>                   | 0.58       | [0.34; 0.75]  |
| <b>AT</b>                   | 0.74       | [0.57; 0.85]  |
| <b>FI</b>                   | 0.78       | [0.63; 0.88]  |
| <b>MTA</b>                  | 0.82       | [0.70; 0.90]  |
| <b>Post</b>                 | 0.69       | [0.48; 0.82]  |
| <b>ARWMC BG</b>             | 0.69       | [0.50; 0.82]  |
| <b>ARWMC CS</b>             | 0.79       | [0.65; 0.88]  |
| <b>Lobar</b>                | 0.89       | [0.80; 0.94]  |
| <b>Microbleeds</b>          |            |               |
| <b>EPVS CS</b>              | 0.77       | [0.61; 0.87]  |
| <b>EPVS BG</b>              | 0.65       | [0.44; 0.79]  |

Supplemental Table 2 – Intra-class correlation coefficients for two raters based on a two-way mixed effects model for consistency. ARWMC – age-related white matter changes; EPVS – enlarged perivascular spaces; BG – basal ganglia and CS – centrum semiovale.

**Supplemental Table 3 – Characteristics of CAA with dementia vs CAA without dementia patients**

|                                            | <b>CAA with<br/>dementia<br/>(n=25)</b> | <b>CAA without<br/>dementia (n=33)</b> | <b>p-value</b>                                |
|--------------------------------------------|-----------------------------------------|----------------------------------------|-----------------------------------------------|
| <b>Mean age (± std)</b>                    | 75.88 (±7.49)                           | 68.27 (±10.14)                         | <b>t(55.978) = -3.28;<br/>p-value = 0.002</b> |
| <b>Male(%)</b>                             | 10 (40%)                                | 19 (57%)                               | X(1) = 1.1248; p-<br>value = 0.2889           |
| <b>Hypertension (%)</b>                    | 19 (76%)                                | 26 (79%)                               | X(1) = 2.8592e-31;<br>p-value = 1             |
| <b>Dyslipidemia (%)</b>                    | 13 (52%)                                | 21 (64%)                               | X(1) = 0.387; p-<br>value = 0.534             |
| <b>Diabetes (%)</b>                        | 4 (16%)                                 | 9 (27%)                                | X(1) = 0.387; p-<br>value = 0.534             |
| <b>Lobar hemorrhage</b>                    | 18 (72%)                                | 24 (73%)                               | X(1) = 8.0416e-31;<br>p-value = 1             |
| <b>Cortical superficial<br/>siderosis</b>  | 20 (80%)                                | 18 (55%)                               | X(1) = 3.0305; p-<br>value = 0.082            |
| <b>Lobar Microbleeds</b>                   |                                         |                                        |                                               |
| <b>0</b>                                   | 0 (0%)                                  | 5 (15.2%)                              | Fisher's exact test;<br>p-value = 0.057       |
| <b>1-5</b>                                 | 10 (40%)                                | 16 (48.5%)                             |                                               |
| <b>&gt;5</b>                               | 15 (60%)                                | 12 (36.4%)                             |                                               |
| <b>Basal ganglia<br/>ARWMC (± std)</b>     | 2 [IQR: 1]                              | 1.5 [IQR: 1]                           | <b>W(573); p-value =<br/>0.01</b>             |
| <b>Centrum Semiovale<br/>ARWMC (± std)</b> | 2 [IQR: 1.5]                            | 1.5 [IQR: 1]                           | <b>W(542); p-value =<br/>0.04</b>             |

Supplemental Table 3 – Demographical and imaging characteristics of cerebral amyloid angiopathy (CAA) patients without dementia (normal cognition and MCI) and with dementia. ARWMC – age-related white matter changes.

**Supplemental Table 4 – Characteristics of CAA with dementia vs CAA without dementia patients according to sex**

|                                               | Female<br>without<br>dementia<br>(n=14) | Male<br>without<br>dementia<br>(n=19) | Female<br>with<br>dementia<br>(n=15) | Male with<br>dementia<br>(n=10) | p-value                                                                                                                                                                                                                                          |
|-----------------------------------------------|-----------------------------------------|---------------------------------------|--------------------------------------|---------------------------------|--------------------------------------------------------------------------------------------------------------------------------------------------------------------------------------------------------------------------------------------------|
| <b>Mean age<br/>(years ± std)</b>             | 66.07<br>(±10.92)                       | 69.89<br>(±8.82)                      | 75.67<br>(±9.49)                     | 76.2<br>(±8.08)                 | <b><math>F(3) = 3.758</math>;</b><br><b>p-value = 0.016</b><br>[TukeyHSD:<br>Male with<br>Dementia vs<br>Female without<br>Dementia; p-<br>value = 0.047;<br>Women with<br>Dementia<br>versus Women<br>without<br>Dementia: p-<br>value = 0.032] |
| <b>Hypertension<br/>(%)</b>                   | 11 (79%)                                | 15 (79%)                              | 12 (80%)                             | 7 (70%)                         | Fisher's exact<br>test; p-value =<br>0.9199                                                                                                                                                                                                      |
| <b>Dyslipidemia<br/>(%)</b>                   | 9 (64%)                                 | 12 (63%)                              | 11 (73%)                             | 2 (20%)                         | Fisher's exact<br>test; p-value =<br>0.057                                                                                                                                                                                                       |
| <b>Diabetes (%)</b>                           | 4 (29%)                                 | 5 (26%)                               | 2 (13%)                              | 2 (20%)                         | Fisher's exact<br>test; p-value =<br>0.7828                                                                                                                                                                                                      |
| <b>Lobar<br/>hemorrhage</b>                   | 12 (86%)                                | 12 (63%)                              | 11 (73%)                             | 7 (70%)                         | Fisher's exact<br>test; p-value =<br>0.6067                                                                                                                                                                                                      |
| <b>Cortical<br/>superficial<br/>siderosis</b> | 8 (57%)                                 | 10 (53%)                              | 12 (80%)                             | 8 (80%)                         | Fisher's exact<br>test; p-value =<br>0.2806                                                                                                                                                                                                      |

---

|                    |           |           |         |         |                                             |
|--------------------|-----------|-----------|---------|---------|---------------------------------------------|
| <b>Lobar</b>       |           |           |         |         |                                             |
| <b>Microbleeds</b> |           |           |         |         |                                             |
| <b>0</b>           | 2         | 3 (15.8%) | 0 (0%)  | 0 (0%)  | Fisher's exact<br>test; p-value =<br>0.4602 |
| <b>1-5</b>         | (14.3%)   | 10        | 6 (40%) | 4 (40%) |                                             |
| <b>&gt;5</b>       | 6 (42.9%) | (52.6%)   | 9 (60%) | 6 (60%) |                                             |
|                    | 6 (42.9%) | 6 (31.6%) |         |         |                                             |

---

Supplemental Table 4 – Demographical and imaging characteristics of cerebral amyloid angiopathy (CAA) patients without dementia (normal cognition and MCI) and with dementia by sex.

**Supplemental Table 5 – Medial temporal lobe atrophy: Multiple regression coefficients and p-values**

| <b>Dependent Variable</b> | <b>Intercept</b> | <b>Age</b>     | <b>Sex</b> | <b>cSS</b> | <b>Dementia</b> | <b>Dementia* Sex</b> |
|---------------------------|------------------|----------------|------------|------------|-----------------|----------------------|
| <b>MTA (%)</b>            | -31.559          | <b>0.971**</b> | -0.843     | 0.823      | 0.802           | <b>21.369*</b>       |

Supplemental Table 5 – Multiple linear regression with medial temporal atrophy (%), as measured by the visual rating score, as the dependent variable and age, sex (male = 1), presence of cortical superficial siderosis, presence of dementia and a dementia\*sex interaction term as independent variables. Values represent coefficient estimates. Statistical significance considered at p-values < 0.05. p-values: \* < 0.05, \*\* < 0.01 and \*\*\* < 0.001.

**Supplemental Table 6 – Contrast tests between groups for medial temporal lobe atrophy**

| <b>Contrast Tests</b>               |  | <b>Estimates</b> | <b>Standard Error</b> | <b>p-values (Bonferroni correction)</b> |
|-------------------------------------|--|------------------|-----------------------|-----------------------------------------|
| <b>Male Dem vs Female Dem</b>       |  | 20.526           | 7.10162               | <b>0.0246</b>                           |
| <b>Male Dem vs Male no Dem</b>      |  | 22.171           | 7.28875               | <b>0.0118</b>                           |
| <b>Female Dem vs Female no Dem</b>  |  | 0.802            | 7.005                 | 1.0000                                  |
| <b>Male no Dem vs Female no Dem</b> |  | -0.843           | 6.323                 | 1.0000                                  |

Supplemental Table 6 – Contrast coefficients based on multiple linear regression in Supplemental Table 5. Coefficient estimates are shown with standard error and p-values after Bonferroni correction for multiple comparisons. Statistical significance considered at p-values < 0.05 after bonferroni correction. Male no Dem: Male, no dementia; Female no Dem: Female, no dementia; Male Dem: Male, dementia; Female Dem: Female, dementia.



**A**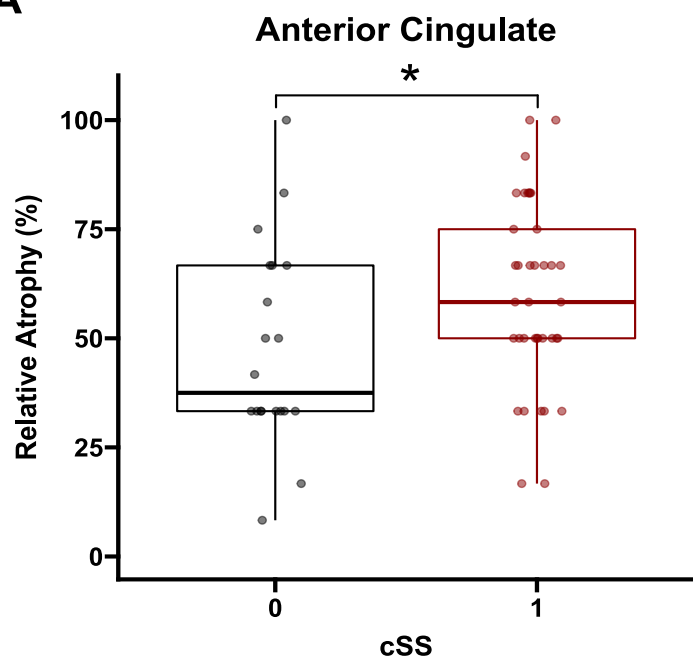**B**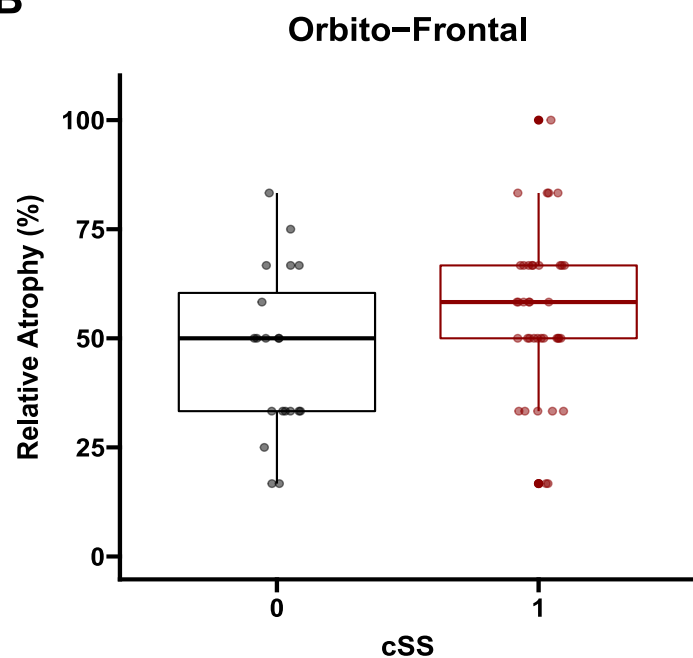**C**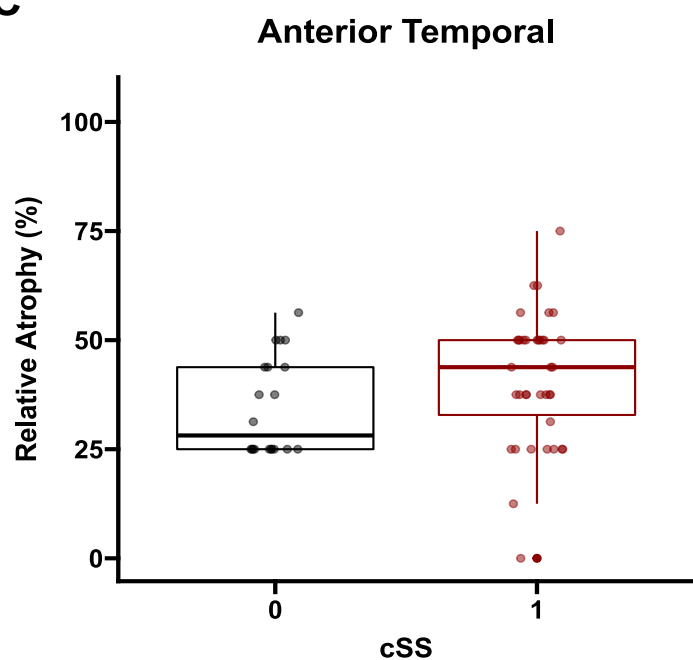**D**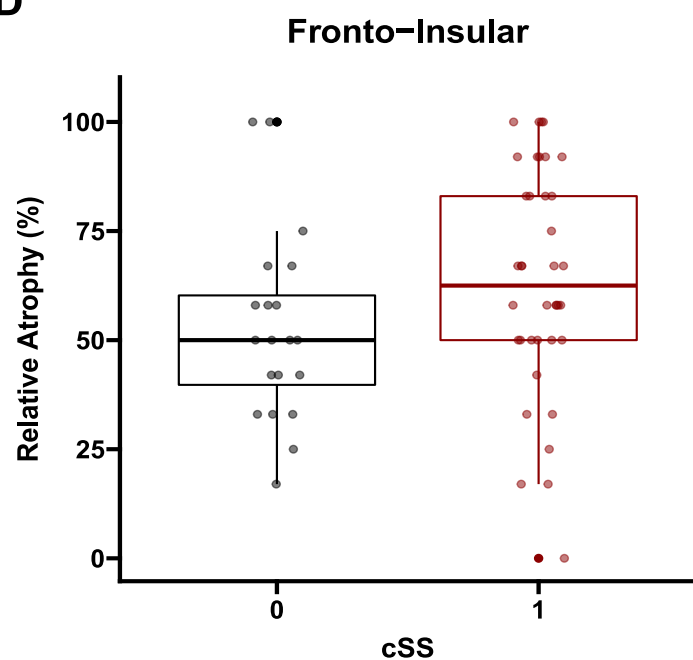**E**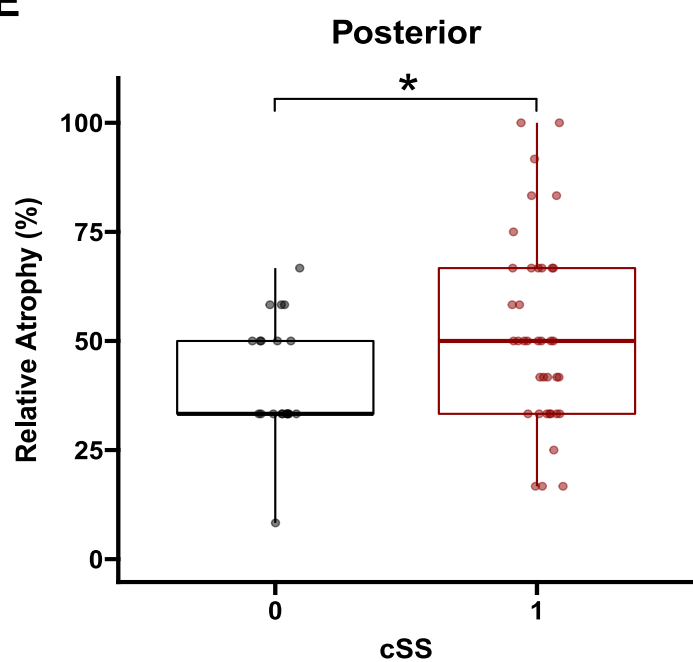**Figure S1**

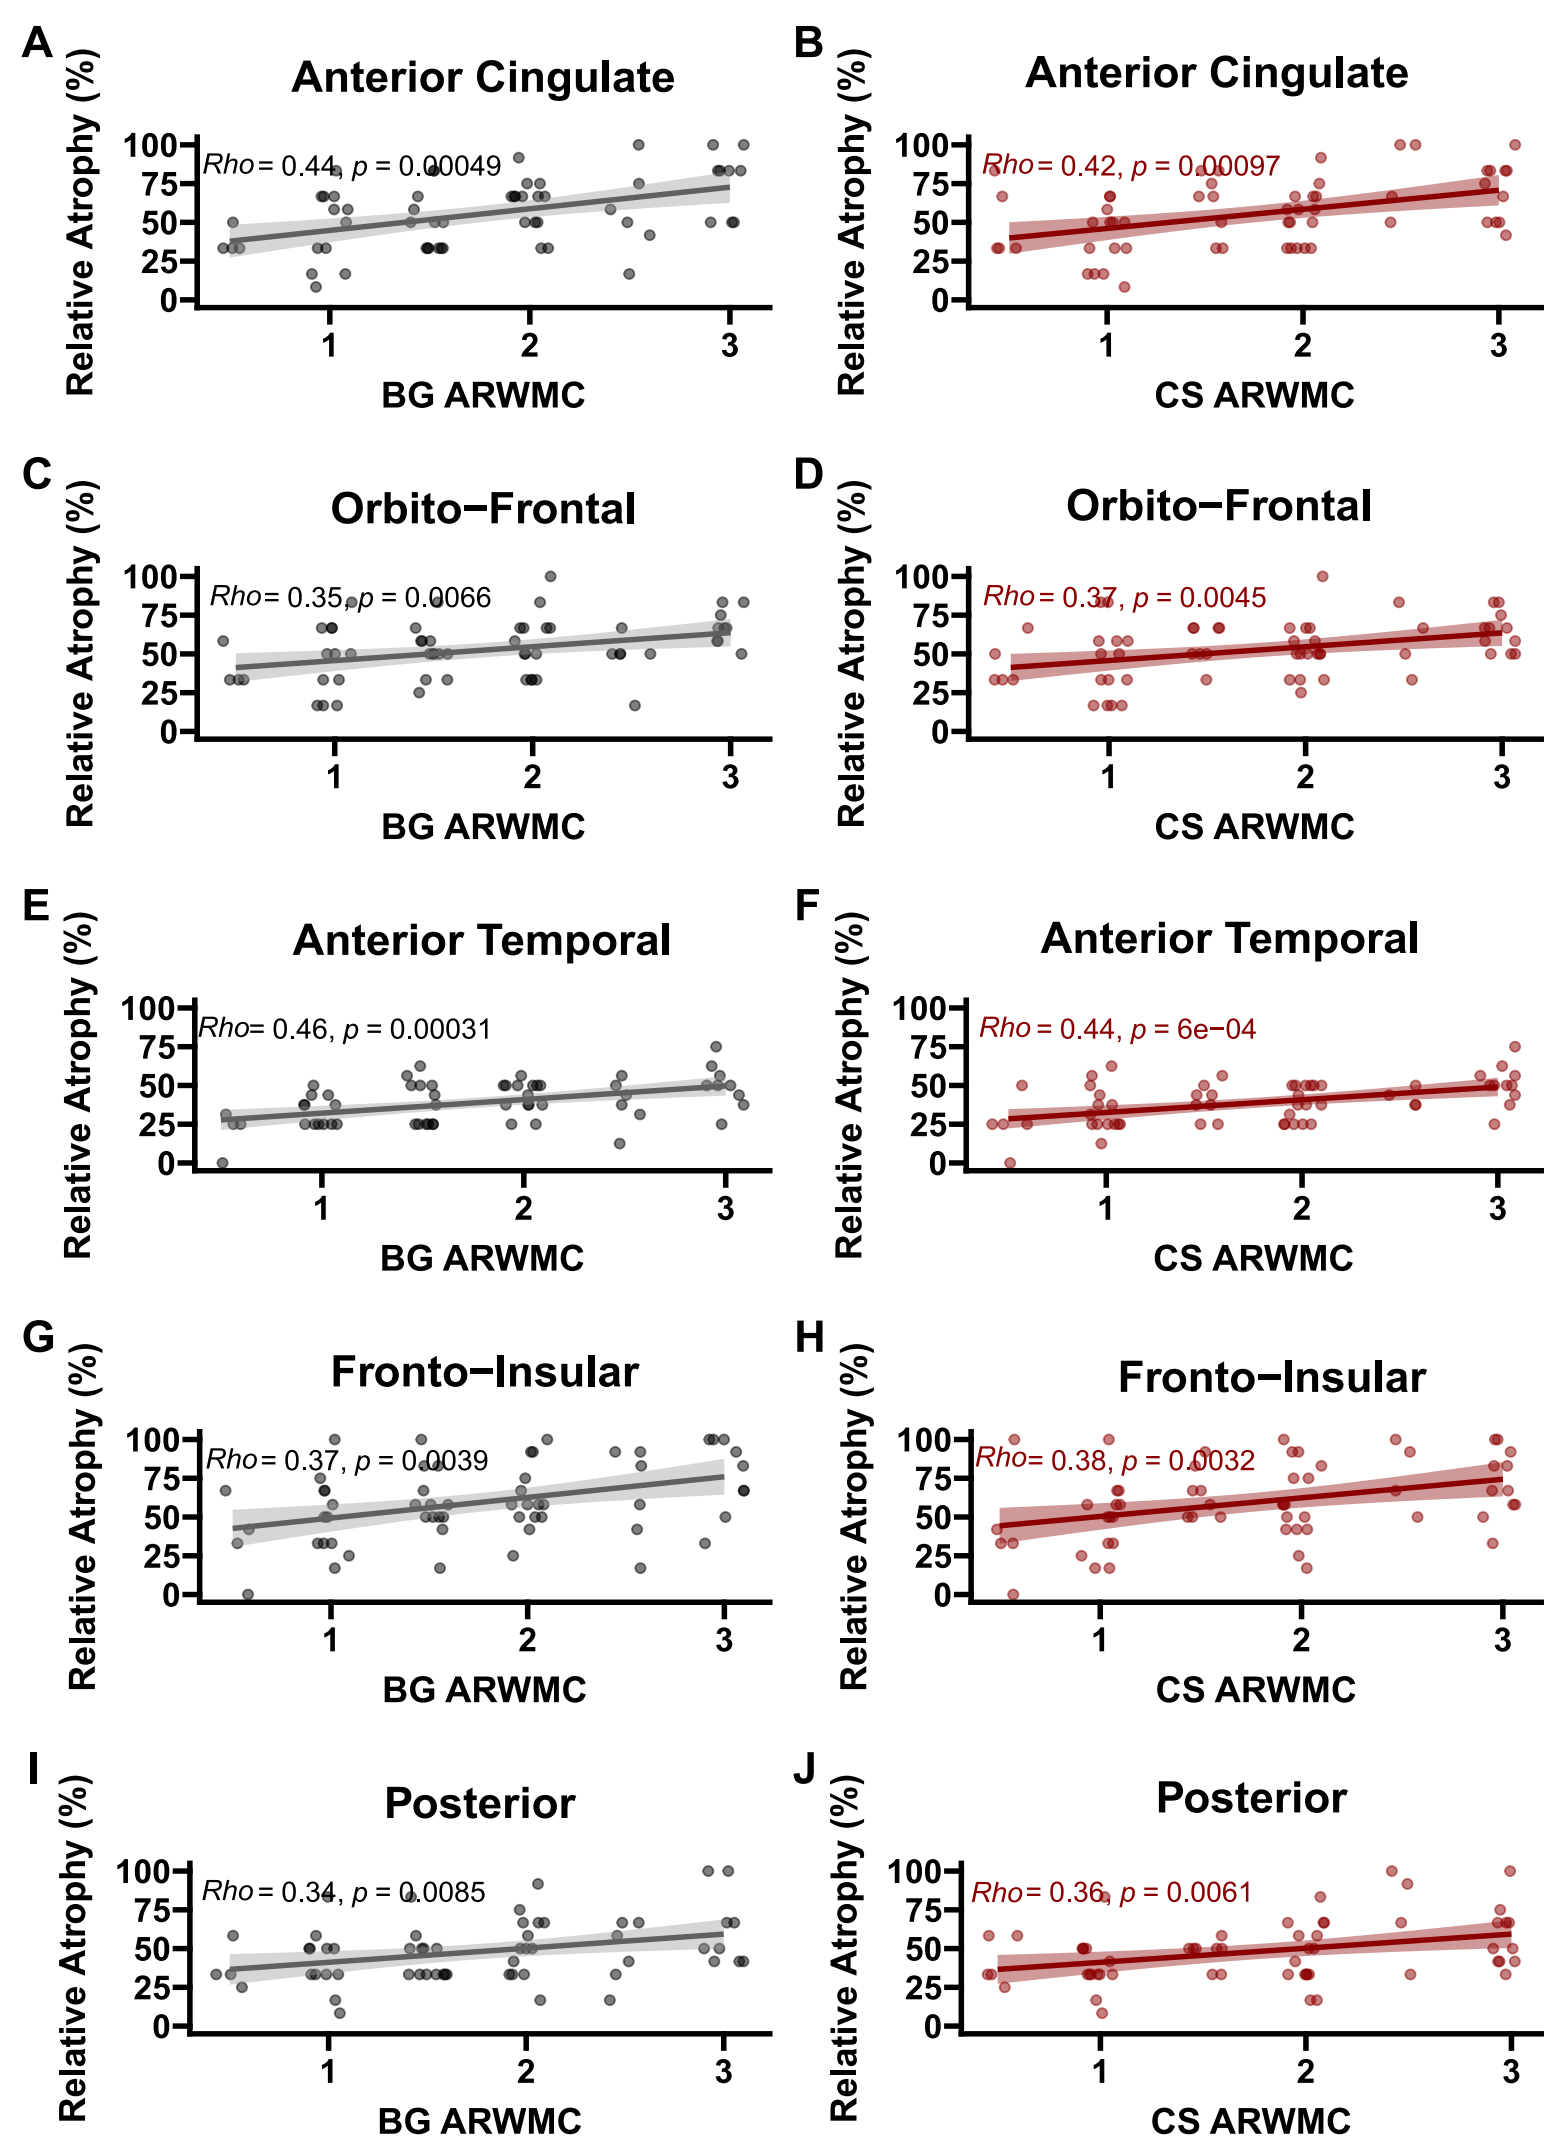

**Figure S2**

### **Supplemental Figure 1**

Visual Rating Scores of all brain regions according to the presence or absence of Cortical Superficial Siderosis (cSS). Statistical significance considered at p-values < 0.05.

### **Supplemental Figure 2**

Spearman correlation analysis of Visual Rating Scores of all brain regions with Basal Ganglia ARWMC Score (BG ARWMC); Centrum Semiovale ARWMC Score (CS ARWMC). Spearman correlation coefficient (Rho). Statistical significance considered at p-values < 0.05.
